# Supplementary material
Source: PubMed Central journal article supplement (PMC3039740)
Supplement: auto0607_0936SD1.pdf [file auto0607_0936SD1.pdf]

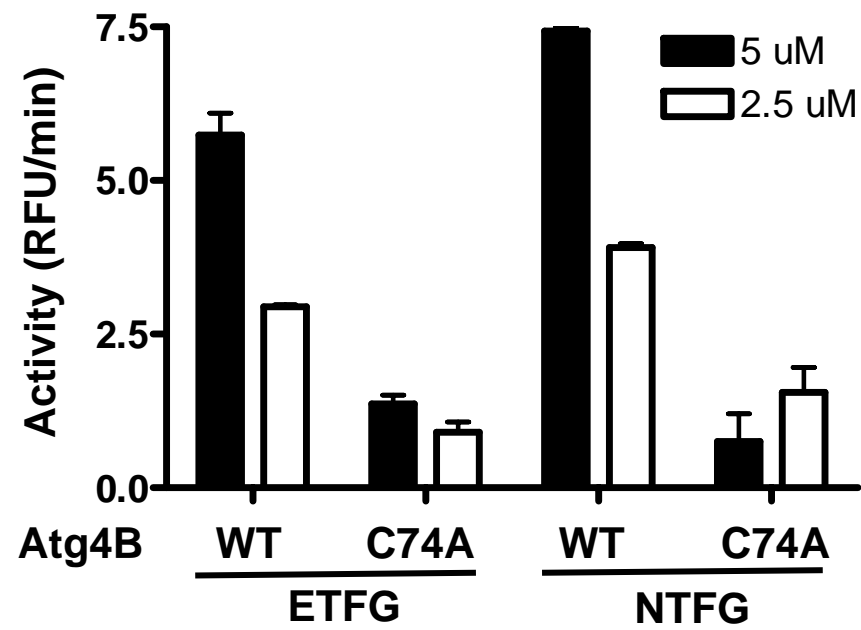

**Fig. S1**  
**Shu, et al.**

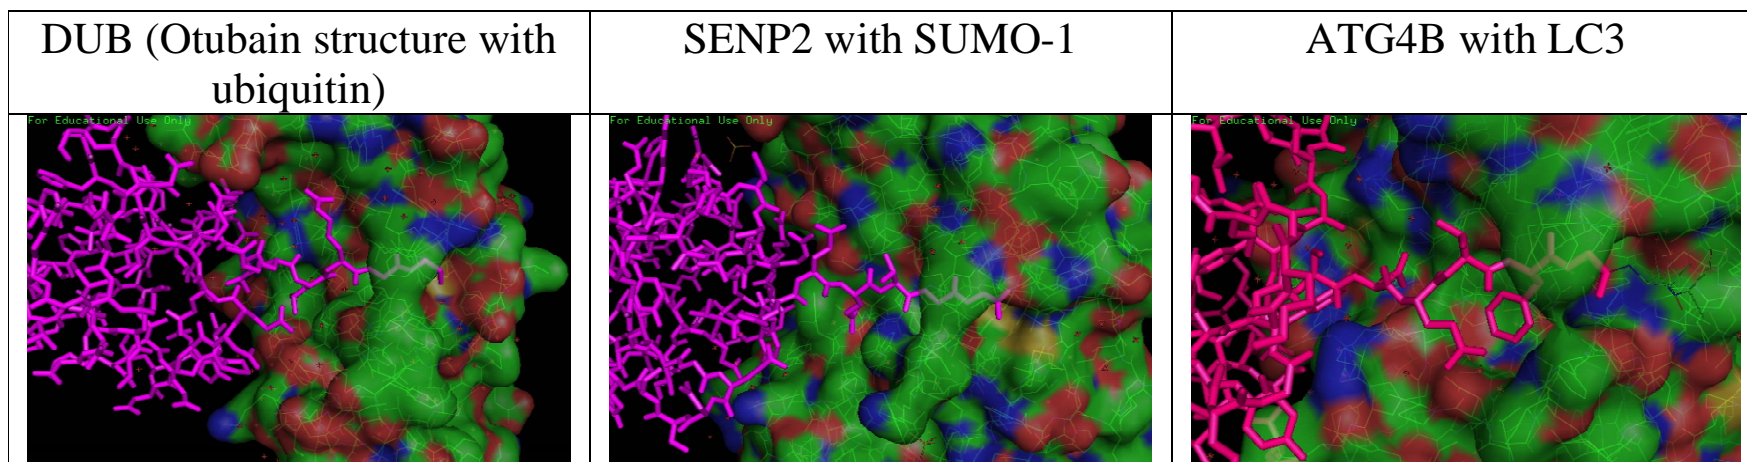

**Fig. S2**  
**Shu, et al.**

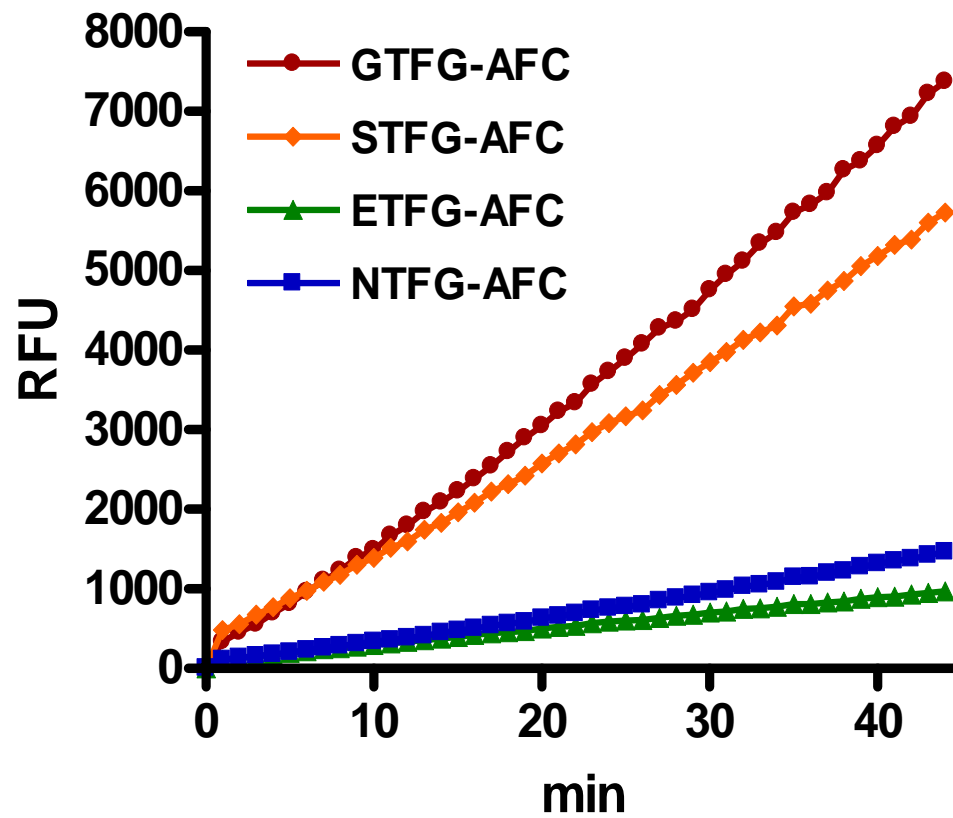

**Fig. S3**

**Shu, et al.**

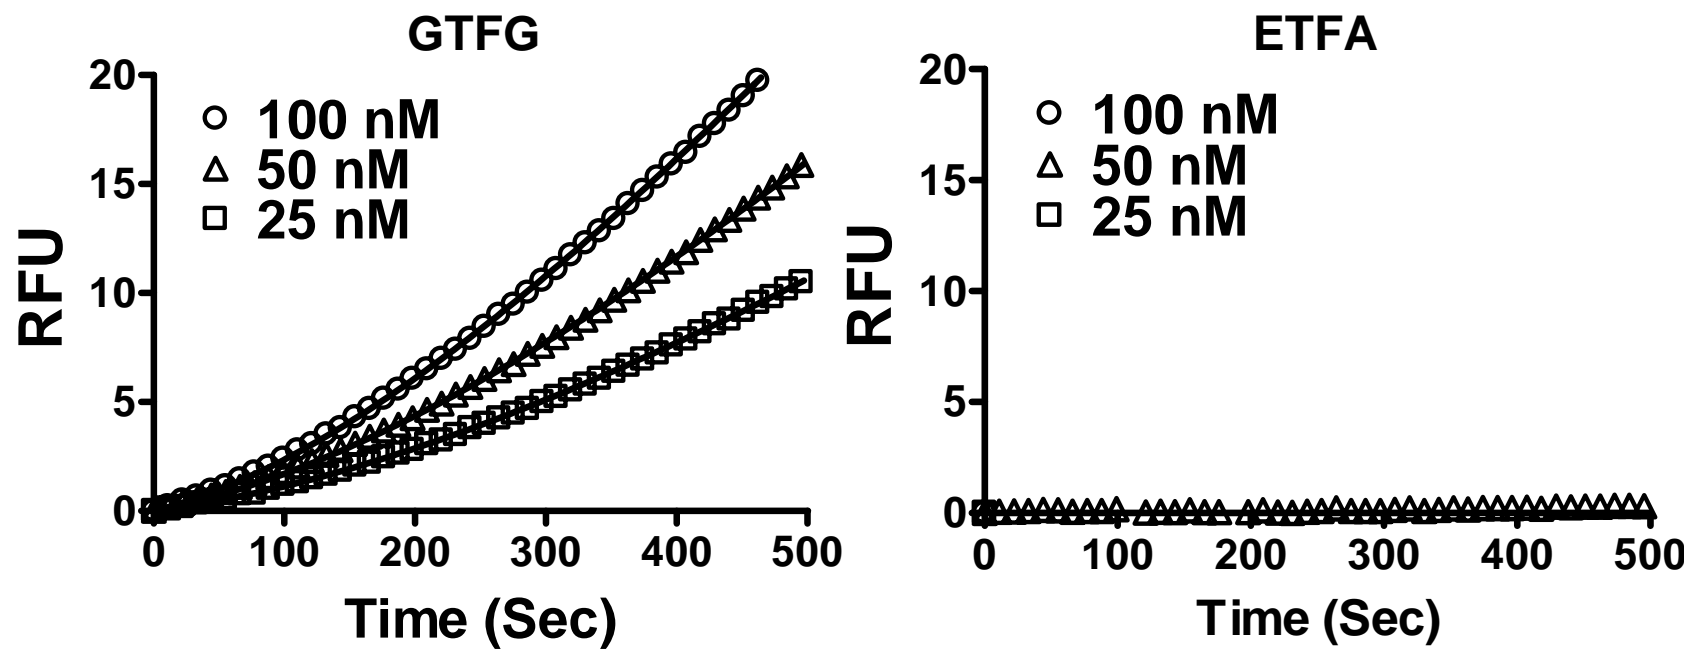

Fig. S4  
Shu, et al.

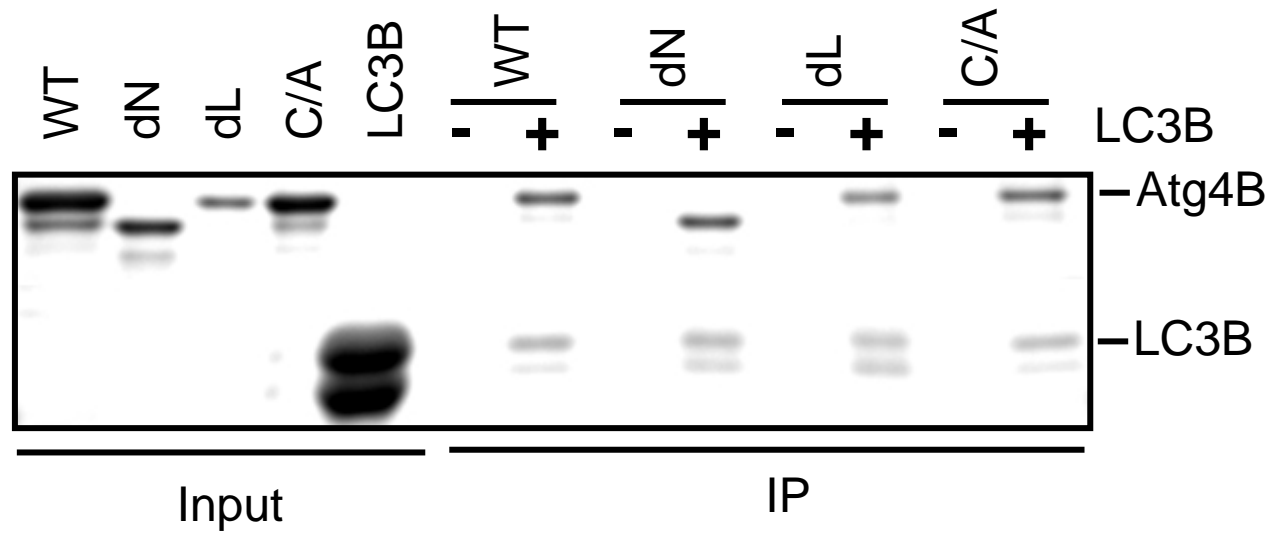

**Fig. S5**  
**Shu, et al.**

**A**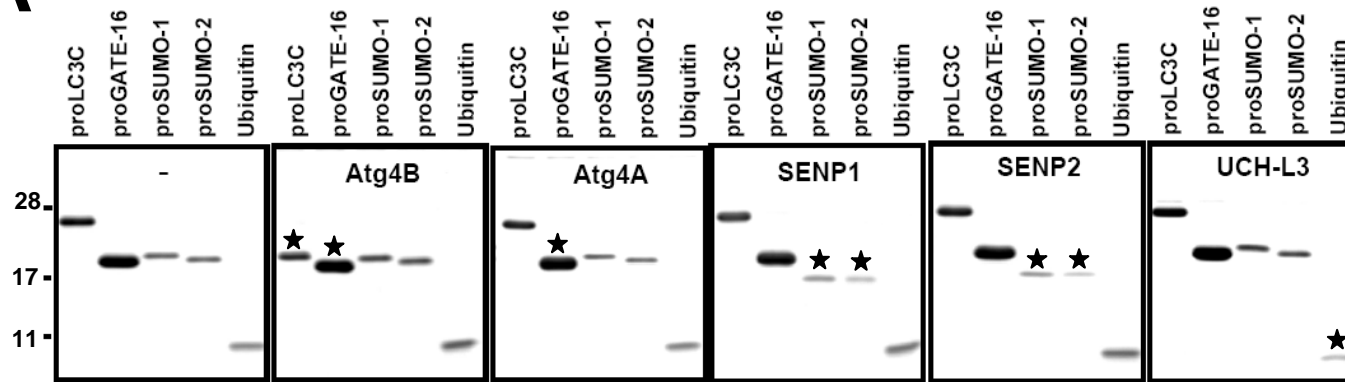**B**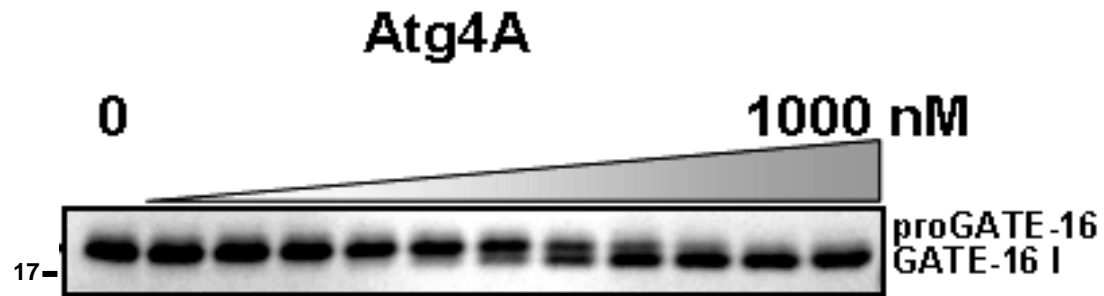

**Fig. S6**  
**Shu, et al.**

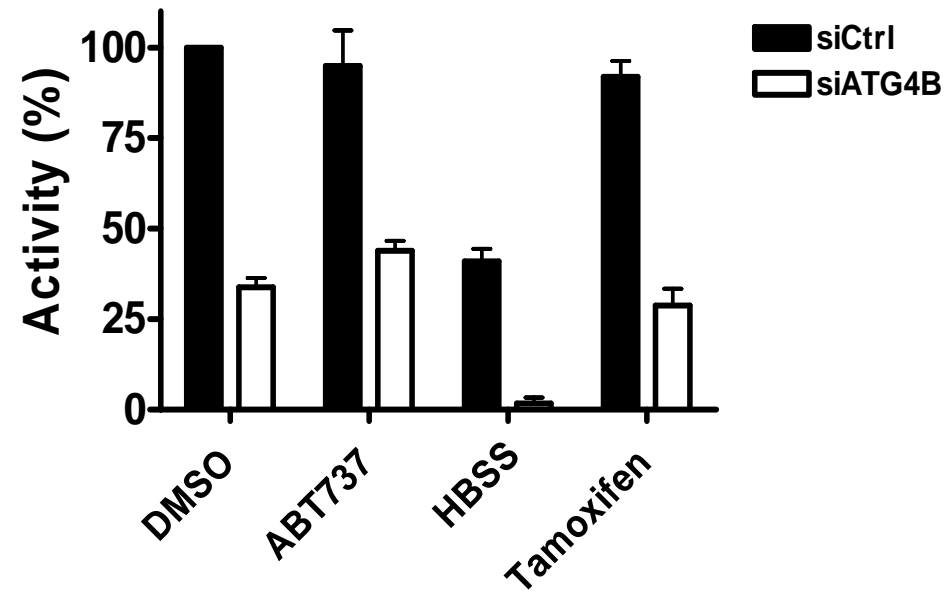

**Fig. S7**  
**Shu, et al.**

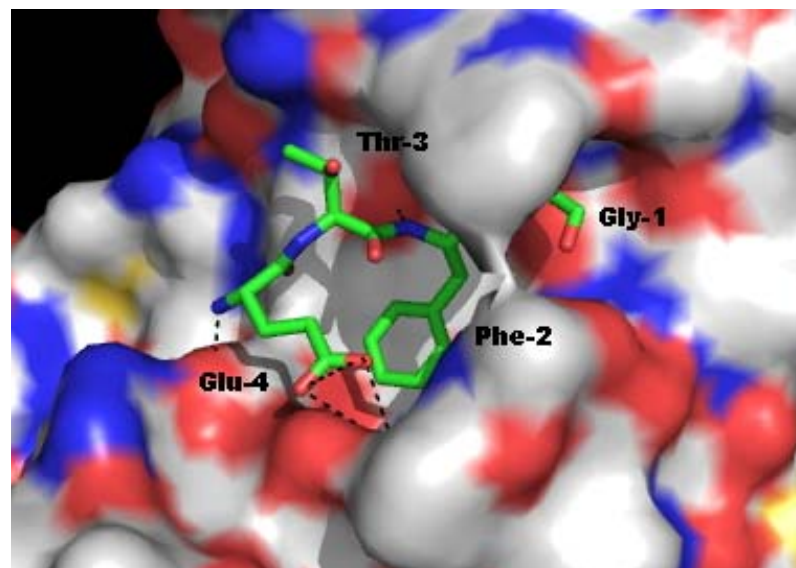

**Fig. S8**  
**Shu, et al.**



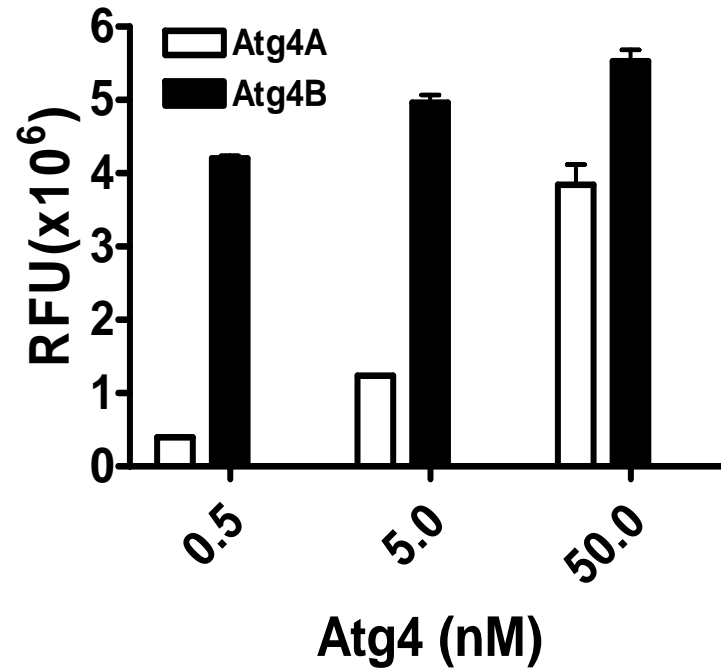

**Fig. S9**  
**Shu, et al.**
